# Supplementary material for: From microcrystalline cellulose to hard- and softwood-based feedstocks: their hydrogenolysis to polyols over a highly efficient ruthenium–tungsten catalyst
Source: Royal Society of Chemistry journal article supplement (doi:10.1039/c5gc00421g), 2015-01-01
Supplement: c5gc00421g1.pdf [file c5gc00421g1.pdf]

## Electronic Supplementary Information (ESI)

# From microcrystalline cellulose to hard- and softwood-based feedstocks: their hydrogenolysis to polyols over a highly efficient ruthenium-tungsten catalyst

**Authors:** Katarína Fabičovicová<sup>a</sup>, Martin Lucas<sup>a</sup>, Peter Claus<sup>\*a</sup>

### Affiliations:

<sup>a</sup> Technical University Darmstadt, Dept. Chemistry, Chemical Technology II, Alarich-Weiss-Straße 8, 64287 Darmstadt, Germany.

Fax: +49 6151 164788; Tel: +49 6151 165369; E-mail: claus@tc2.tu-darmstadt.de

This section includes:

Supplementary Text

Figs. S1 to S4

Table S1

### Supplementary Text

#### Structural features of Ru/W/AC after cellulose hydrogenolysis (curve c of Figs. S1, S2)

Compared to the fresh Ru/W/AC catalyst which showed one TPR peak with a maximum at 360 K allocated to ruthenium dioxide reduction (reduction temperature of polycrystalline RuO<sub>2</sub> = 434 K (39), the two peaks in the low-temperature region of the used catalyst indicates either the reduction of two different oxidized ruthenium species (RuO<sub>x</sub>) formed in hot compressed water or the presence of smaller and larger particles of ruthenium dioxide (39). The hydrogen consumption in the region of 450-600 K is assigned to the reduction of oxygenates adsorbed on the catalyst surface during the reaction. The diffractogram revealed the presence of tungsten and traces of a phase which cannot be identified with the help of reference codes.

XRD reference codes: 00-026-1080, C; 00-032-1393, WO<sub>2</sub>; 98-007-1732, W; 01-073-0471, WC; 98-009-9060, W<sub>2</sub>C (HighScorePlus (version 3.0.d) using data bases PAN ICSD (40) and PDF2 flat file (41)).

39. J. Assmann, PhD Thesis, Ruhr-University Bochum, 2004.

40. ICSD Database FIZ Karlsruhe 2009-2.

41. PDF-2 Release 1999 (ICDD).

Figs. S1 to S4

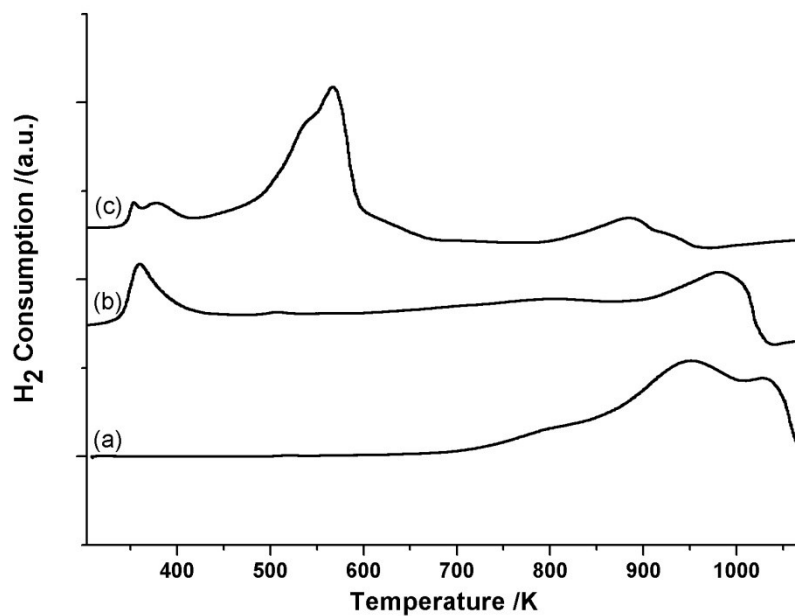

Fig. S1 H<sub>2</sub>-TPR pattern of W/AC (a) and of Ru/W/AC before (b) and after (c) reaction.

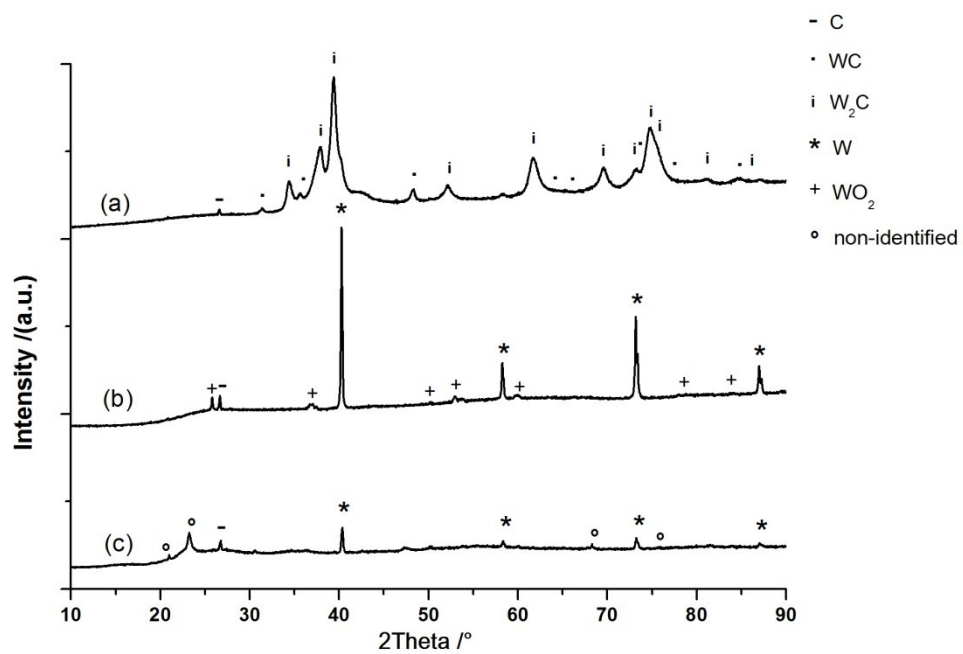

Fig. S2 XRD patterns of W/AC (a) and Ru/W/AC before (b) and after (c) reaction.

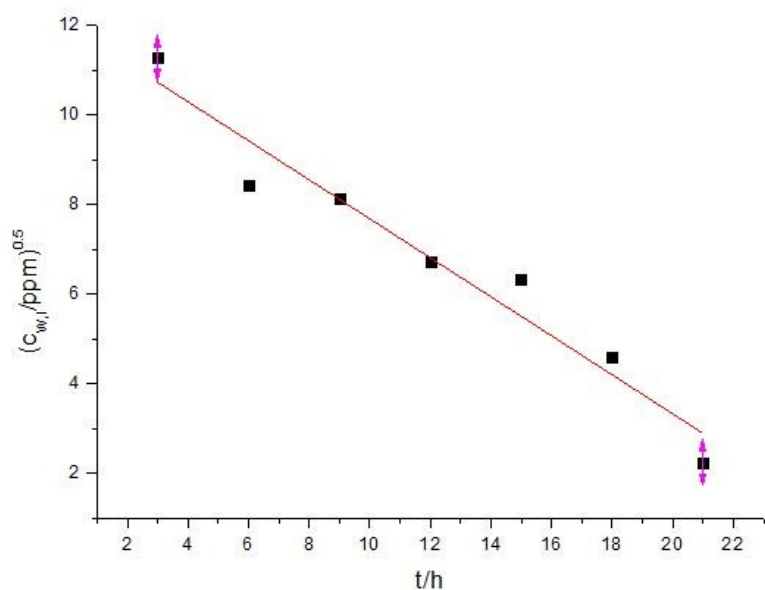

Fig. S3 Kinetics of tungsten leaching.

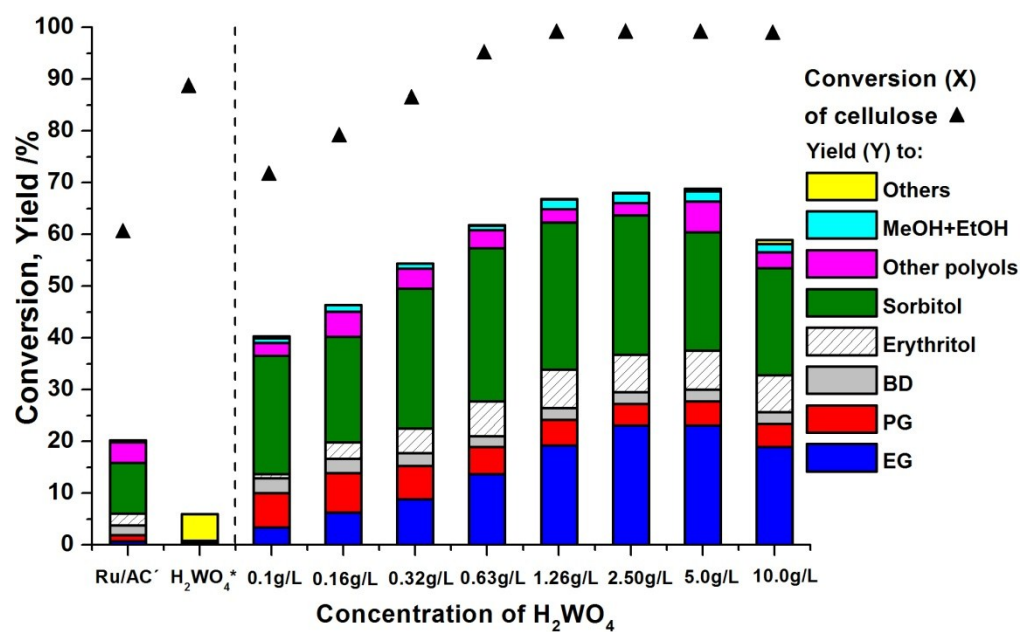

Fig. S4 Cellulose conversions and product yields for the hydrogenolysis of cellulose over Ru/AC catalyst in combination with different amounts of tungsten acid. Reaction conditions: 0.5 g catalyst, 5 g cellulose, 100 mL water, reaction temperature 493 K, 65 bar of hydrogen pressure (measured at reaction temperature), 1000 rpm, 3 hours reaction time, \*: experiment only with 0.5 g of Ru/AC, \*: experiment only with 0.5 g of tungsten acid.

**Table S1.** Carbon efficiency coefficients (CEL) for experiments with ball-milled cellulose.

| #  | Time of ball-milling<br>[min] | Reaction Time<br>[h] | CEL<br>[%] |
|----|-------------------------------|----------------------|------------|
| 1  | 0                             | 1                    | 76.4       |
| 2  | 0                             | 2                    | 81.5       |
| 3  | 0                             | 3                    | 76.7       |
| 4  | 4                             | 1                    | 79.5       |
| 5  | 4                             | 2                    | 76.4       |
| 6  | 4                             | 3                    | 74.2       |
| 7  | 15                            | 1                    | 68.5       |
| 8  | 15                            | 2                    | 66.3       |
| 9  | 15                            | 3                    | 64.9       |
| 10 | 30                            | 3                    | 59.5       |
| 11 | 120                           | 3                    | 56.7       |
| 12 | 720                           | 3                    | 18.5       |
| 13 | 4 mix-milling                 | 3                    | 89.9       |
